# Supplementary material for: Mapping Retrotransposon LINE-1 Sequences into Two Cebidae Species and Homo sapiens Genomes and a Short Review on Primates
Source: MDPI journal article supplement (doi:10.3390/genes13101742), 2022-09-27
Supplement: s1 [file s1]

Schema for RepeatMasker - RepeatMasker Repetitive Elements

**Database:** hub\_2004795\_GCF\_000001405.39    **Primary Table:** hub\_2004795\_repeatMasker    **Data last updated:** 2022-05-14  
**Big Bed File:** [https://hgdownload.soe.ucsc.edu/hubs/GCF/000/001/405/GCF\\_000001405.39/bbi/GCF\\_000001405.39\\_GRCh38.p13.rmsk.bb](https://hgdownload.soe.ucsc.edu/hubs/GCF/000/001/405/GCF_000001405.39/bbi/GCF_000001405.39_GRCh38.p13.rmsk.bb)  
**Item Count:** 4,751,049  
**Format description:** Repetitive Element Annotation

| field       | example                                                                                                                                                                                |
|-------------|----------------------------------------------------------------------------------------------------------------------------------------------------------------------------------------|
| chrom       | NW_011332701v1_alt                                                                                                                                                                     |
| chromStart  | 3330017                                                                                                                                                                                |
| chromEnd    | 3336395                                                                                                                                                                                |
| name        | L1ME3C#LINE/L1                                                                                                                                                                         |
| score       | 252                                                                                                                                                                                    |
| strand      | -                                                                                                                                                                                      |
| thickStart  | 3330203                                                                                                                                                                                |
| thickEnd    | 3330777                                                                                                                                                                                |
| reserved    | 0                                                                                                                                                                                      |
| blockCount  | 5                                                                                                                                                                                      |
| blockSizes  | 186,34,0,254,5618                                                                                                                                                                      |
| blockStarts | -1,186,-1,506,-1                                                                                                                                                                       |
| id          | 197534                                                                                                                                                                                 |
| description | 662 25.2 10.3 1.0 NW_011332701v1_alt 3330204 3330237 (1668725) C L1ME3C LINE/L1 (186) 5937 5900 197534,662 25.2 10.3 1.0 NW_011332701v1_alt 3330524 3330777 (1668185) C L1ME3C LINE/L1 |

Sample Rows

| chrom              | chromStart | chromEnd | name                  | score | strand | thickStart | thickEnd | reserved | blockCount | blockSizes                                         | blockStarts                         |
|--------------------|------------|----------|-----------------------|-------|--------|------------|----------|----------|------------|----------------------------------------------------|-------------------------------------|
| NW_011332701v1_alt | 3330017    | 3336395  | L1ME3C#LINE/L1        | 252   | -      | 3330203    | 3330777  | 0        | 5          | 186,34,0,254,5618                                  | -1,186,-1,506,-1                    |
| NW_011332701v1_alt | 3332459    | 3332920  | EUTREP2#DNA?/hAT?     | 286   | +      | 3332480    | 3332814  | 0        | 3          | 20,334,106                                         | -1,21,-1                            |
| NW_011332701v1_alt | 3333000    | 3333206  | MIR3#SINE/MIR         | 341   | -      | 3333011    | 3333100  | 0        | 3          | 11,89,106                                          | -1,11,-1                            |
| NW_011332701v1_alt | 3333684    | 3340275  | L1MC4a#LINE/L1        | 304   | +      | 3337279    | 3340011  | 0        | 15         | 3594,147,0,189,32,220,0,327,1203,250,0,27,0,19,264 | -1,3595,-1,3975,-1,4311,-1,4845,-1, |
| NW_011332701v1_alt | 3334429    | 3337849  | L2#LINE/L2            | 314   | +      | 3336438    | 3336526  | 0        | 3          | 2008,88,1323                                       | -1,2009,-1                          |
| NW_011332701v1_alt | 3335383    | 3338902  | L2a#LINE/L2           | 266   | -      | 3335391    | 3336429  | 0        | 5          | 8,236,16,564,2473                                  | -1,8,-1,482,-1                      |
| NW_011332701v1_alt | 3335559    | 3335870  | AluY#SINE/Alu         | 49    | +      | 3335640    | 3335863  | 0        | 3          | 80,223,7                                           | -1,81,-1                            |
| NW_011332701v1_alt | 3337425    | 3337670  | AluSz#SINE/Alu        | 120   | +      | 3337426    | 3337659  | 0        | 3          | 0,233,11                                           | -1,1,-1                             |
| NW_011332701v1_alt | 3337872    | 3337945  | A-rich#Low_complexity | 245   | +      | 3337873    | 3337945  | 0        | 3          | 0,72,0                                             | -1,1,-1                             |
| NW_011332701v1_alt | 3338214    | 3338531  | AluSp#SINE/Alu        | 67    | +      | 3338215    | 3338529  | 0        | 3          | 0,314,2                                            | -1,1,-1                             |

RepeatMasker (hub\_2004795\_repeatMasker) Track Description

Description

This track shows the Repeat Masker annotations on the 28 Feb 2019 *Homo sapiens*/GCF\_000001405.39\_GRCh38.p13 genome assembly.

This track was created by using Arian Smit's [RepeatMasker](#) program, which screens DNA sequences for interspersed repeats and low complexity DNA sequences. The program outputs a detailed annotation of the repeats (generally available on the [Downloads](#) page). RepeatMasker uses the [Repbse Update](#) library of repeats from the [Genetic Information Research Institute](#) (GIRI). Repbase Update is described in Jurka (2000) in the Refere

Display Conventions and Configuration

Context Sensitive Zooming

This track employs a technique which chooses the appropriate visual representation for the data based on the zoom scale, and or the number of annotations currently in view. The track will automatically switch from the mo

[https://genome.ucsc.edu/cgi-bin/hgTables?db=hub\\_2004795\\_GCF\\_000001405.39&hgta\\_group=varRep&hgta\\_track=hub\\_2004795\\_repeatMasker&hgta\\_table=hub\\_2004795\\_repeatMasker&hgta\\_doSchema=describe+table+schema](https://genome.ucsc.edu/cgi-bin/hgTables?db=hub_2004795_GCF_000001405.39&hgta_group=varRep&hgta_track=hub_2004795_repeatMasker&hgta_table=hub_2004795_repeatMasker&hgta_doSchema=describe+table+schema) 1/4

view ('Dense' mode) if more than 500 annotations are present in the current view.

### Dense Mode Visualization

In dense display mode, a single line is displayed denoting the coverage of repeats using a series of colored boxes. The boxes are colored based on the classification of the repeat (see below for legend).

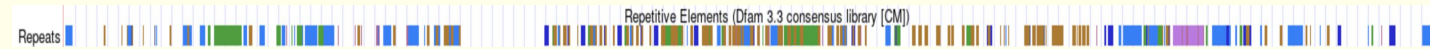

### Pack Mode Visualization

In pack mode, repeats are represented as sets of joined features. These are color coded as above based on the class of the repeat, and the further details such as orientation (denoted by chevrons) and a family label are provided.

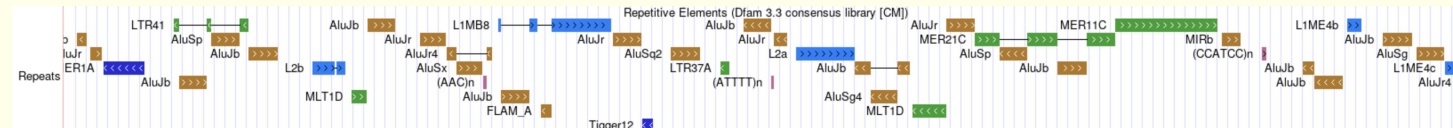

The pack display mode may also be configured to resemble the original UCSC repeat track. In this visualization repeat features are grouped by classes (see below), and displayed on separate track lines. The repeat range is indicated by a shaded box. The higher the combined number of these, the lighter the shading.

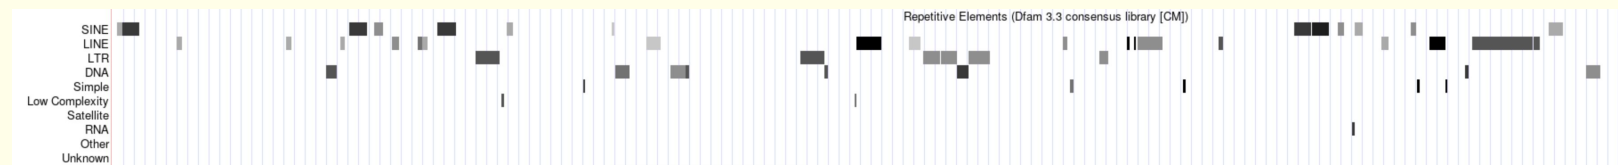

### Full Mode Visualization

In the most detailed visualization repeats are displayed as chevron boxes, indicating the size and orientation of the repeat. The interior grayscale shading represents the divergence of the repeat (see above) while the outline indicates for where a repeat fragment originates in its consensus or pHMM model. If the length of the unaligned sequence is large, an interruption line and bp size is indicated instead of drawing the extension to scale.

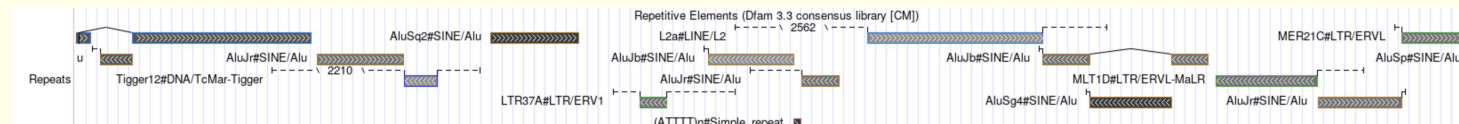

For example, the following repeat is a SINE element in the forward orientation with average divergence. Only the 5' proximal fragment of the consensus sequence is aligned to the genome. The 3' unaligned length (384bp)

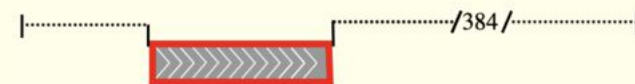

Repeats that have been fragmented by insertions or large internal deletions are now represented by join lines. In the example below, a LINE element is found as two fragments. The solid connection lines indicate that there is a connection between the two fragments following the last fragment.

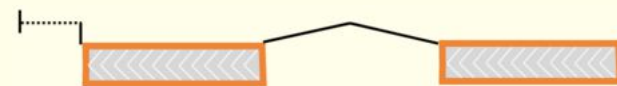

In cases where there is unaligned consensus sequence between the fragments, the repeat will look like the following. The dotted line indicates the length of the unaligned sequence between the two fragments. In this case

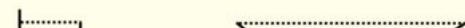

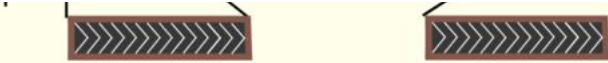

If there is consensus overlap between the two fragments, the joining lines will be drawn to indicate how much of the left fragment is repeated in the right fragment.

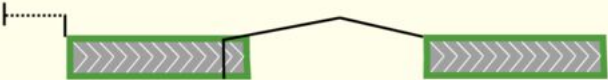

The following table lists the repeat class colors:

| Color       | Repeat Class                                                        |
|-------------|---------------------------------------------------------------------|
| <div></div> | SINE - Short Interspersed Nuclear Element                           |
| <div></div> | LINE - Long Interspersed Nuclear Element                            |
| <div></div> | LTR - Long Terminal Repeat                                          |
| <div></div> | DNA - DNA Transposon                                                |
| <div></div> | Simple - Single Nucleotide Stretches and Tandem Repeats             |
| <div></div> | Low_complexity - Low Complexity DNA                                 |
| <div></div> | Satellite - Satellite Repeats                                       |
| <div></div> | RNA - RNA Repeats (including RNA, tRNA, rRNA, snRNA, scRNA, srpRNA) |
| <div></div> | Other - Other Repeats (including class RC - Rolling Circle)         |
| <div></div> | Unknown - Unknown Classification                                    |

A "?" at the end of the "Family" or "Class" (for example, DNA?) signifies that the curator was unsure of the classification. At some point in the future, either the "?" will be removed or the classification will be changed.

Methods

The RepeatMasker ([www.repeatmasker.org](http://www.repeatmasker.org)) tool was used to generate the datasets found on this track hub.

Class profiles

- 1,891,263 - SINE
- 1,606,379 - LINE
- 779,205 - LTR
- 717,567 - Simple
- 543,873 - DNA
- 105,991 - Low\_complexity
- 17,896 - Satellite
- 13,220 - Other
- 12,741 - RNA

Detail class profiles

- 1,891,263 - SINE
- 1,606,379 - LINE
- 770,871 - LTR
- 717,567 - Simple\_repeat
- 539,623 - DNA

- 105,991 - Low\_complexity
- 17,896 - Satellite
- 8,334 - LTR?
- 5,915 - Retroposon
- 5,352 - snRNA
- 4,868 - Unknown
- 4,250 - DNA?
- 2,043 - tRNA
- 1,935 - rRNA
- 1,926 - scRNA
- 1,859 - RC
- 1,485 - srpRNA
- 417 - RC?
- 161 - Unspecified

## Credits

Thanks to Arian Smit, Robert Hubley and GIRI for providing the tools and repeat libraries used to generate this track.

## References

Smit AFA, Hubley R, Green P. *RepeatMasker Open-3.0*. <http://www.repeatmasker.org>. 1996-2010.

Repbase Update is described in:

Jurka J. [Repbase Update: a database and an electronic journal of repetitive elements](#). *Trends Genet*. 2000 Sep;16(9):418-420. PMID: [10973072](#)

For a discussion of repeats in mammalian genomes, see:

Smit AF. [Interspersed repeats and other mementos of transposable elements in mammalian genomes](#). *Curr Opin Genet Dev*. 1999 Dec;9(6):657-63. PMID: [10607616](#)

Smit AF. [The origin of interspersed repeats in the human genome](#). *Curr Opin Genet Dev*. 1996 Dec;6(6):743-8. PMID: [8994846](#)
